# Supplementary material for: Effects of Dapagliflozin on Symptoms, Function, and Quality of Life in Patients With Heart Failure and Reduced Ejection Fraction: Results From the DAPA-HF Trial
Source: PubMed Central journal article supplement (PMC6964869; doi:10.1161/circulationaha.119.044138), 2019-11-17
Supplement: cir-141-90-s001.pdf [file cir-141-90-s001.pdf]

## SUPPLEMENTAL MATERIAL

### Supplemental Tables

**Supplemental Table 1:** Baseline characteristics in patients with recorded vs missing KCCQ-TSS at randomization

|                                            | Baseline KCCQ recorded<br>N=4,443 | Missing baseline KCCQ data<br>N=301 | p-value |
|--------------------------------------------|-----------------------------------|-------------------------------------|---------|
| Randomized to dapagliflozin                | 2,234 (50.3%)                     | 139 (46.2%)                         | 0.17    |
| Age – yr                                   | 66.3±10.7                         | 66.8±13.4                           | 0.44    |
| Female sex – no. (%)                       | 991 (22.3)                        | 118 (39.2)                          | <0.001  |
| Race – no. (%)                             |                                   |                                     | <0.001  |
| Asian                                      | 987 (22.2)                        | 129 (42.9)                          |         |
| Black Or African American                  | 211 (4.7)                         | 15 (5.0)                            |         |
| Other                                      | 65 (1.5)                          | 4 (1.3)                             |         |
| White                                      | 3,180 (71.6)                      | 153 (50.8)                          |         |
| Region – no. (%)                           |                                   |                                     | <0.001  |
| North America                              | 644 (14.5)                        | 33 (11.0)                           |         |
| South America                              | 766 (17.2)                        | 51 (16.9)                           |         |
| Europe                                     | 2,064 (46.5)                      | 90 (29.9)                           |         |
| Asia/Pacific                               | 969 (21.8)                        | 127 (42.2)                          |         |
| NYHA functional classification – no. (%)   |                                   |                                     | 0.39    |
| II                                         | 2,992 (67.3)                      | 211 (70.1)                          |         |
| III                                        | 1,409 (31.7)                      | 89 (29.6)                           |         |
| IV                                         | 42 (0.9)                          | 1 (0.3)                             |         |
| Heart rate – beats/min                     | 71.4±11.7                         | 73.5±12.1                           | 0.003   |
| Systolic Blood Pressure – mm Hg            | 121.8±16.3                        | 121.8±17.0                          | 0.96    |
| Left ventricular ejection fraction – %     | 31.1±6.8                          | 30.7±6.9                            | 0.38    |
| Median NT-proBNP (IQR) – pg/ml             | 1432.0 (855.1–2635.7)             | 1493.3 (891.6–2735.7)               | 0.34    |
| Baseline HbA1c (%)                         | 6.5±1.3                           | 6.5±1.5                             | 0.86    |
| Principal cause of heart failure – no. (%) |                                   |                                     | 0.93    |
| Ischemic                                   | 2,506 (56.4)                      | 168 (55.8)                          |         |
| Nonischemic                                | 1,580 (35.6)                      | 107 (35.5)                          |         |
| Unknown                                    | 357 (8.0)                         | 26 (8.6)                            |         |
| Medical history – no. (%)                  |                                   |                                     |         |
| Hospitalization for heart failure          | 2,126 (47.9)                      | 125 (41.5)                          | 0.034   |
| Atrial fibrillation                        | 1,722 (38.8)                      | 96 (31.9)                           | 0.018   |
| Diabetes                                   | 1868 (42.0)                       | 115 (38.2)                          | 0.19    |
| Estimated GFR                              |                                   |                                     |         |
| eGFR – mL/min/1.73m <sup>2</sup>           | 65.7±19.2                         | 67.6±22.2                           | 0.098   |
| eGFR < 60 mL/min/1.73m <sup>2</sup>        | 1,805 (40.6)                      | 121 (40.2)                          | 0.88    |
| Device therapy – no. (%)                   |                                   |                                     |         |
| Implantable cardioverter-defibrillator     | 1,201 (27.0)                      | 41 (13.6)                           | <0.001  |
| Cardiac resynchronization therapy          | 343 (7.7)                         | 11 (3.7)                            | 0.009   |
| Heart failure medication – no. (%)         |                                   |                                     |         |
| Diuretic                                   | 4,160 (93.6)                      | 273 (90.7)                          | 0.047   |
| ACE inhibitor                              | 2,486 (56.0)                      | 175 (58.1)                          | 0.46    |
| Angiotensin receptor blocker               | 1,212 (27.3)                      | 95 (31.6)                           | 0.11    |
| Sacubitril-valsartan                       | 490 (11.0)                        | 18 (6.0)                            | 0.006   |
| Beta-blocker                               | 4,274 (96.2)                      | 284 (94.4)                          | 0.11    |
| Mineralocorticoid receptor antagonist      | 3,149 (70.9)                      | 221 (73.4)                          | 0.35    |
| Digoxin                                    | 817 (18.4)                        | 70 (23.3)                           | 0.036   |
| Diabetes medications* – no. (%)            |                                   |                                     |         |
| Metformin                                  | 963 (50.8)                        | 67 (58.3)                           | 0.81    |
| Sulfonylurea                               | 406 (21.7)                        | 32 (27.8)                           | 0.40    |
| DPP4-inhibitor                             | 298 (16.0)                        | 12 (10.4)                           | 0.065   |
| GLP-1 receptor agonist                     | 20 (1.1)                          | 1 (0.9)                             | 0.77    |
| Insulin                                    | 510 (27.3)                        | 30 (26.1)                           | 0.42    |

\*Glucose-lowering medications are listed only for the patients who had a history of diabetes at baseline; Data are mean ± standard deviation, median (interquartile range) or no. (%); ACE, angiotensin-converting enzyme;

DPP4; dipeptidyl peptidase-4; eGFR, estimated glomerular filtration rate; GLP-1, glucagon-like peptide-1; KCCQ, Kansas City Cardiomyopathy Questionnaire; NT-proBNP, N-terminal pro b-type natriuretic peptide; NYHA, New York Heart Association; TSS, total symptom score; Yr, year

**Supplemental Table 2:** Clinical outcomes by recorded versus missing KCCQ-TSS at randomization

|                                                         | <b>Baseline KCCQ<br/>data recorded</b> | <b>Baseline KCCQ<br/>data missing</b> | <b>p-value</b> |
|---------------------------------------------------------|----------------------------------------|---------------------------------------|----------------|
| <b>Cardiovascular death/HF<br/>Hosp/Urgent HF visit</b> | 831 (18.7%)                            | 57 (18.9%)                            | 0.92           |
| <b>Cardiovascular death/HF Hosp</b>                     | 821 (18.5%)                            | 56 (18.6%)                            | 0.96           |
| <b>HF Hosp/Urgent HF visit</b>                          | 533 (12.0%)                            | 30 (10.0%)                            | 0.29           |
| <b>HF Hosp</b>                                          | 520 (11.7%)                            | 29 (9.6%)                             | 0.28           |
| <b>Cardiovascular death</b>                             | 465 (10.5%)                            | 35 (11.6%)                            | 0.53           |
| <b>All cause death</b>                                  | 564 (12.7%)                            | 41 (13.6%)                            | 0.64           |

Data are no. (%); HF, heart failure; Hosp, hospitalization; KCCQ, Kansas City Cardiomyopathy Questionnaire; TSS, total symptom score
